# Supplementary material for: Focal Point Evaluation of Energies for Tautomers and Isomers for 3-hydroxy-2-butenamide: Evaluation of Competing Internal Hydrogen Bonds of Types -OH…O=, -OH…N, -NH…O=, and CH…X (X=O and N)
Source: MDPI journal article supplement (doi:10.3390/molecules26092623), 2021-04-30
Supplement: s1 [file s1]

# Supplementary Information (Geometry)

Table of Contents

SYSTEM ONE .....2

SYSTEM TWO .....3

SYSTEM THREE .....3

SYSTEM FOUR .....4

SYSTEM FIVE .....6

SYSTEM SIX .....7

SYSTEM SEVEN .....8

SYSTEM EIGHT .....9

NINTH EXAMPLE .....10

SYSTEM TEN .....11

SYSTEM ELEVEN .....12

## System ONE

NUMBERING for ONE

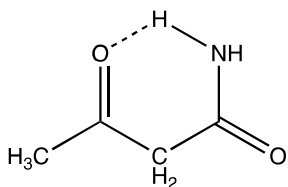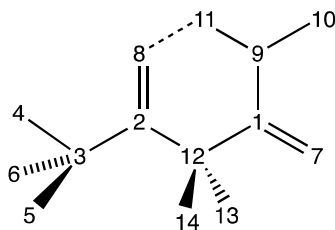

|    |     |         |         |         |   |
|----|-----|---------|---------|---------|---|
| 1  | C1  | -1.3491 | -0.2156 | 0.0178  | C |
| 2  | C2  | 1.2093  | 0.1308  | 0.0721  | C |
| 3  | C3  | 2.4072  | -0.7002 | -0.2894 | C |
| 4  | H4  | 3.2361  | -0.0614 | -0.5757 | H |
| 5  | H5  | 2.1450  | -1.3669 | -1.1116 | H |
| 6  | H6  | 2.6884  | -1.3315 | 0.5535  | H |
| 7  | O7  | -2.1703 | -1.0534 | -0.3189 | O |
| 8  | O8  | 1.2146  | 1.3482  | -0.0281 | O |
| 9  | N9  | -1.5658 | 1.1235  | -0.0146 | N |
| 10 | H10 | -2.3966 | 1.4356  | -0.4869 | H |
| 11 | H11 | -0.7652 | 1.7336  | 0.0471  | H |
| 12 | C12 | 0.0030  | -0.6286 | 0.5915  | C |
| 13 | H13 | 0.1067  | -1.6971 | 0.4301  | H |
| 14 | H14 | -0.0301 | -0.4538 | 1.6704  | H |

OH...N angle = 131°; N...O distance = 2.789 Å

## SYSTEM TWO

NUMBERING for TWO

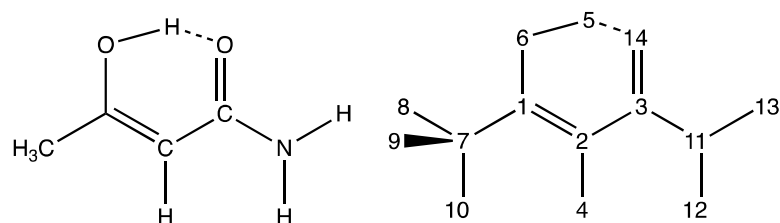

|    |     |         |         |         |   |
|----|-----|---------|---------|---------|---|
| 1  | C1  | 1.1679  | -0.0705 | 0.0003  | C |
| 2  | C2  | -0.0054 | -0.7575 | -0.0073 | C |
| 3  | C3  | -1.2628 | -0.0311 | -0.0040 | C |
| 4  | H4  | 0.0109  | -1.8351 | -0.0197 | H |
| 5  | H5  | 0.2587  | 1.5453  | 0.0028  | H |
| 6  | O6  | 1.2197  | 1.2584  | 0.0073  | O |
| 7  | C7  | 2.5078  | -0.7195 | 0.0012  | C |
| 8  | H8  | 3.0645  | -0.4049 | 0.8827  | H |
| 9  | H9  | 3.0700  | -0.3954 | -0.8734 | H |
| 10 | H10 | 2.4225  | -1.8019 | -0.0050 | H |
| 11 | N11 | -2.4053 | -0.7683 | -0.0315 | N |
| 12 | H12 | -2.3779 | -1.7539 | 0.1480  | H |
| 13 | H13 | -3.2714 | -0.2776 | 0.1026  | H |
| 14 | O14 | -1.3180 | 1.2134  | -0.0022 | O |

OH...O angle = 151°; O...O distance = 3.538 Å

## SYSTEM THREE

# NUMBERING for THREE

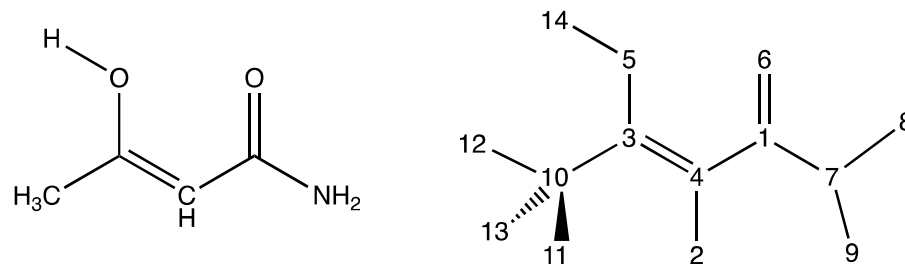

|    |     |         |         |         |   |
|----|-----|---------|---------|---------|---|
| 1  | C1  | -1.3359 | 0.0434  | -0.0285 | C |
| 2  | H2  | -0.0391 | -1.7351 | -0.1183 | H |
| 3  | C3  | 1.1689  | -0.0649 | 0.0023  | C |
| 4  | C4  | -0.0391 | -0.6578 | -0.0510 | C |
| 5  | O5  | 1.2971  | 1.2792  | 0.0882  | O |
| 6  | O6  | -1.4834 | 1.2539  | -0.0865 | O |
| 7  | N7  | -2.4169 | -0.8174 | 0.0136  | N |
| 8  | H8  | -3.2967 | -0.3752 | 0.2206  | H |
| 9  | H9  | -2.2852 | -1.7402 | 0.3865  | H |
| 10 | C10 | 2.4479  | -0.8375 | -0.0261 | C |
| 11 | H11 | 3.0513  | -0.5323 | -0.8826 | H |
| 12 | H12 | 2.2643  | -1.9049 | -0.0955 | H |
| 13 | H13 | 3.0267  | -0.6418 | 0.8782  | H |
| 14 | H14 | 2.2367  | 1.4872  | 0.1216  | H |

O...O distance = 2.787 Å

## SYSTEM FOUR

# NUMBERING for FOUR

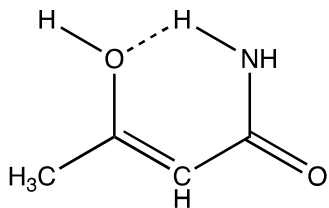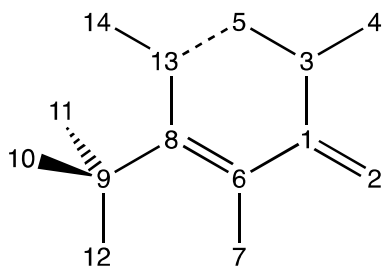

|    |     |         |         |         |   |
|----|-----|---------|---------|---------|---|
| 1  | C1  | 1.4076  | -0.2178 | -0.0026 | C |
| 2  | O2  | 2.3605  | -0.9897 | 0.0260  | O |
| 3  | N3  | 1.5654  | 1.1340  | -0.0441 | N |
| 4  | H4  | 2.5019  | 1.4832  | 0.0480  | H |
| 5  | H5  | 0.7797  | 1.7510  | 0.0378  | H |
| 6  | C6  | 0.0240  | -0.7420 | -0.0146 | C |
| 7  | H7  | -0.0283 | -1.8188 | -0.0256 | H |
| 8  | C8  | -1.1416 | -0.0757 | -0.0004 | C |
| 9  | C9  | -2.4764 | -0.7417 | -0.0052 | C |
| 10 | H10 | -3.0446 | -0.4620 | 0.8838  | H |
| 11 | H11 | -3.0503 | -0.4363 | -0.8819 | H |
| 12 | H12 | -2.3703 | -1.8215 | -0.0212 | H |
| 13 | O13 | -1.1769 | 1.2961  | 0.0203  | O |
| 14 | H14 | -2.0963 | 1.5786  | 0.0346  | H |

O...HN angle = 129°; N...C distance = 2.746 Å

## SYSTEM FIVE

### NUMBERING for FIVE

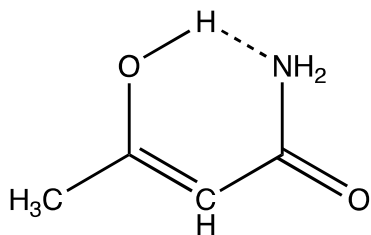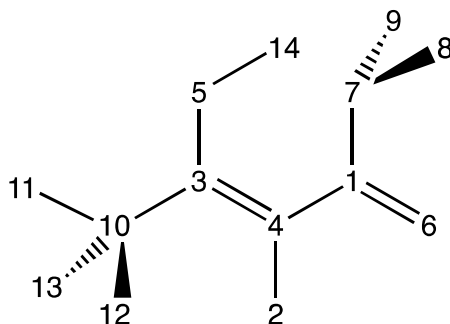

|    |     |         |         |         |   |
|----|-----|---------|---------|---------|---|
| 1  | C1  | 1.1439  | -0.0462 | -0.0029 | C |
| 2  | C2  | 0.0228  | -0.7783 | 0.1943  | C |
| 3  | H3  | 0.1266  | -1.8386 | 0.3559  | H |
| 4  | H4  | 0.2435  | 1.5542  | -0.4421 | H |
| 5  | O5  | 1.1690  | 1.2652  | -0.3243 | O |
| 6  | C6  | 2.5174  | -0.6156 | 0.0806  | C |
| 7  | H7  | 3.1008  | -0.0582 | 0.8123  | H |
| 8  | H8  | 3.0162  | -0.5119 | -0.8820 | H |
| 9  | H9  | 2.4905  | -1.6631 | 0.3629  | H |
| 10 | O10 | -2.2874 | -0.9775 | -0.3051 | O |
| 11 | N11 | -1.5009 | 1.1067  | 0.2421  | N |
| 12 | H12 | -2.4756 | 1.3703  | 0.1846  | H |
| 13 | H13 | -1.0735 | 1.4338  | 1.0988  | H |
| 14 | C14 | -1.3467 | -0.2825 | 0.0363  | C |

OH...N angle = 138°; O...C distance = 2.735 Å

## SYSTEM SIX

NUMBERING for SIX

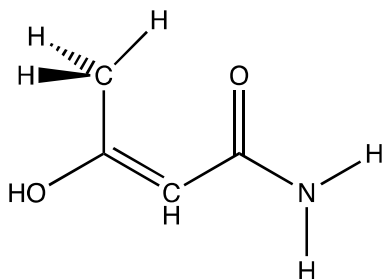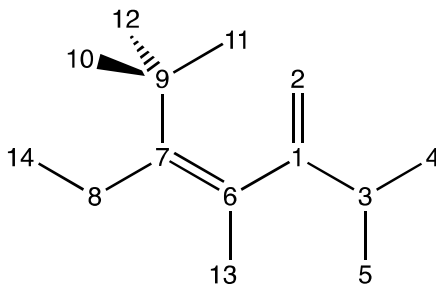

|    |     |         |         |         |   |
|----|-----|---------|---------|---------|---|
| 1  | C1  | -1.3070 | 0.0688  | -0.0142 | C |
| 2  | O2  | -1.4014 | 1.2918  | -0.0393 | O |
| 3  | N3  | -2.4288 | -0.7231 | -0.0103 | N |
| 4  | H4  | -3.2996 | -0.2507 | 0.1592  | H |
| 5  | H5  | -2.3617 | -1.6875 | 0.2567  | H |
| 6  | C6  | -0.0563 | -0.7080 | -0.0278 | C |
| 7  | C7  | 1.1817  | -0.1833 | -0.0011 | C |
| 8  | O8  | 2.2282  | -1.0579 | -0.0129 | O |
| 9  | C9  | 1.5457  | 1.2594  | 0.0404  | C |
| 10 | H10 | 2.1357  | 1.5121  | -0.8425 | H |
| 11 | H11 | 0.6529  | 1.8730  | 0.0656  | H |
| 12 | H12 | 2.1573  | 1.4568  | 0.9227  | H |
| 13 | H13 | -0.1248 | -1.7867 | -0.0614 | H |
| 14 | H14 | 3.0438  | -0.5469 | 0.0057  | H |

CH...O angle = 130°; N...C distance = 2.948 Å

## SYSTEM SEVEN

NUMBERING for SEVEN

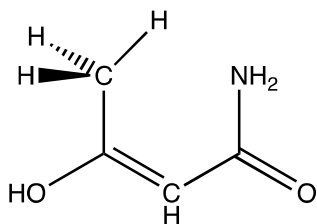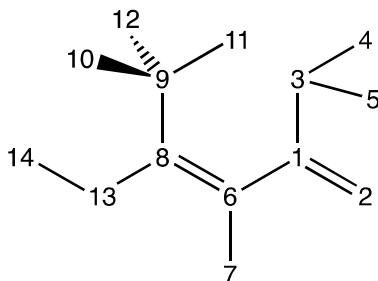

|    |     |         |         |         |   |
|----|-----|---------|---------|---------|---|
| 1  | C1  | -1.3763 | -0.2084 | -0.0124 | C |
| 2  | O2  | -2.2975 | -0.8801 | 0.4283  | O |
| 3  | N3  | -1.5541 | 1.1182  | -0.3642 | N |
| 4  | H4  | -2.5229 | 1.3942  | -0.3998 | H |
| 5  | H5  | -0.9789 | 1.4734  | -1.1084 | H |
| 6  | C6  | -0.0233 | -0.7704 | -0.1812 | C |
| 7  | H7  | 0.0012  | -1.8336 | -0.3713 | H |
| 8  | C8  | 1.1568  | -0.1475 | -0.0159 | C |
| 9  | C9  | 1.4049  | 1.2668  | 0.3948  | C |
| 10 | H10 | 1.8805  | 1.8228  | -0.4152 | H |
| 11 | H11 | 0.4888  | 1.7697  | 0.6810  | H |
| 12 | H12 | 2.0877  | 1.2756  | 1.2465  | H |
| 13 | O13 | 2.2852  | -0.8963 | -0.2065 | O |
| 14 | H14 | 3.0490  | -0.3613 | 0.0298  | H |

CH...N angle = 119°; N...C distance = 3.058 Å



## SYSTEM EIGHT

NUMBERING for EIGHT

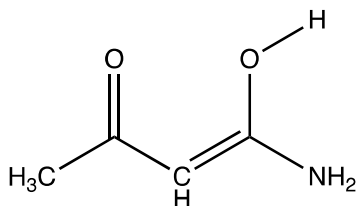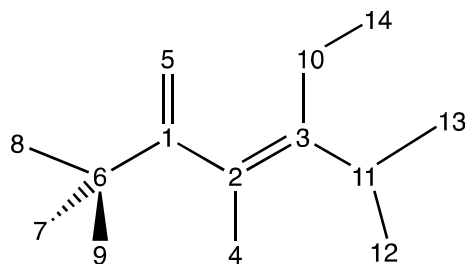

|    |     |         |         |         |   |
|----|-----|---------|---------|---------|---|
| 1  | C1  | -1.2902 | 0.1028  | 0.0017  | C |
| 2  | C2  | -0.0378 | -0.6513 | 0.0628  | C |
| 3  | C3  | 1.2045  | -0.1137 | 0.0198  | C |
| 4  | H4  | -0.0957 | -1.7281 | 0.1222  | H |
| 5  | O5  | -1.3641 | 1.3239  | -0.0444 | O |
| 6  | C6  | -2.5385 | -0.7569 | -0.0031 | C |
| 7  | H7  | -2.5316 | -1.4269 | -0.8630 | H |
| 8  | H8  | -3.4161 | -0.1196 | -0.0413 | H |
| 9  | H9  | -2.5715 | -1.3766 | 0.8932  | H |
| 10 | O10 | 1.4195  | 1.2127  | 0.0693  | O |
| 11 | N11 | 2.3666  | -0.8615 | -0.1273 | N |
| 12 | H12 | 2.2019  | -1.8561 | -0.1318 | H |
| 13 | H13 | 3.0848  | -0.6160 | 0.5404  | H |
| 14 | H14 | 2.2902  | 1.3758  | -0.3146 | H |

O...O distance = 2.788 Å

## NINTH EXAMPLE

NUMBERING for NINE

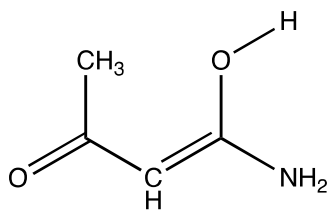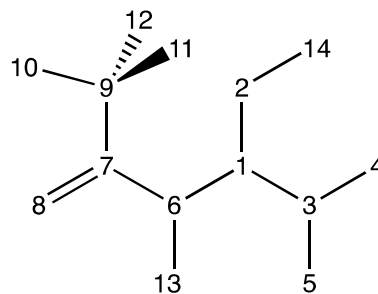

|    |     |         |         |         |   |
|----|-----|---------|---------|---------|---|
| 1  | C1  | -1.6131 | 1.2279  | 0.0843  | C |
| 2  | H2  | -2.6833 | 1.3852  | 0.1747  | H |
| 3  | H3  | -1.0927 | 1.6597  | 0.9366  | H |
| 4  | H4  | -1.2359 | 1.7306  | -0.8042 | H |
| 5  | C5  | -1.3635 | -0.2585 | -0.0026 | C |
| 6  | C6  | 0.0035  | -0.7789 | -0.0323 | C |
| 7  | H7  | 0.0736  | -1.8563 | -0.0678 | H |
| 8  | O8  | -2.3045 | -1.0463 | -0.0451 | O |
| 9  | C9  | 1.1654  | -0.0903 | -0.0190 | C |
| 10 | O10 | 1.2244  | 1.2601  | -0.1296 | O |
| 11 | N11 | 2.4173  | -0.6721 | 0.1463  | N |
| 12 | H12 | 2.3771  | -1.6771 | 0.2209  | H |
| 13 | H13 | 3.0810  | -0.3897 | -0.5624 | H |

14 H14    2.0459    1.5405    0.2935 H

CH...O angle = 129°; N...C distance = 2.948 Å

## SYSTEM TEN

NUMBERING for TENprime

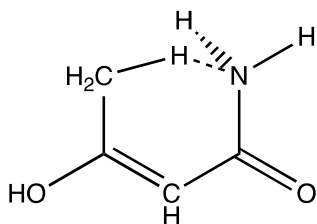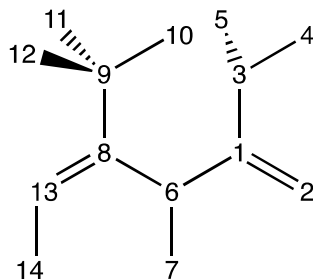

|    |     |         |         |         |   |
|----|-----|---------|---------|---------|---|
| 1  | C1  | 1.3890  | -0.2040 | -0.0072 | C |
| 2  | O2  | 2.3296  | -0.9093 | 0.3447  | O |
| 3  | N3  | 1.5515  | 1.1557  | -0.2766 | N |
| 4  | H4  | 2.5351  | 1.4054  | -0.3651 | H |
| 5  | H5  | 0.9732  | 1.5230  | -1.0275 | H |
| 6  | C6  | 0.0176  | -0.7592 | -0.1449 | C |
| 7  | H7  | 0.0165  | -1.8476 | -0.2835 | H |
| 8  | C8  | -1.1827 | -0.1324 | -0.0044 | C |
| 9  | C9  | -1.4470 | 1.3081  | 0.3231  | C |
| 10 | H10 | -0.5406 | 1.8198  | 0.6665  | H |
| 11 | H11 | -1.8544 | 1.8295  | -0.5606 | H |
| 12 | H12 | -2.2197 | 1.3486  | 1.1073  | H |

13 O13 -2.3646 -0.8053 -0.1267 O  
 14 H14 -2.1521 -1.7270 -0.3439 H

CH...N angle = 128°; N...C distance = 3.061 Å

## SYSTEM ELEVEN

NUMBERING for ELEVEN (ZEOPTFREQMP2TZ)

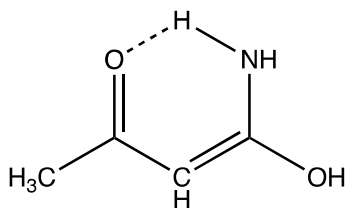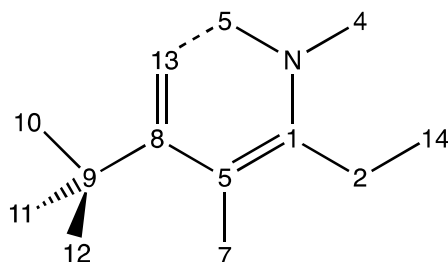

|    |     |         |         |         |   |
|----|-----|---------|---------|---------|---|
| 1  | C1  | 1.2044  | -0.1691 | -0.0138 | C |
| 2  | O2  | 2.2955  | -0.9635 | 0.0679  | O |
| 3  | N3  | 1.4245  | 1.1694  | -0.0791 | N |
| 4  | H4  | 2.1892  | 1.5226  | 0.4739  | H |
| 5  | H5  | 0.5403  | 1.6817  | -0.0192 | H |
| 6  | C6  | -0.0345 | -0.7385 | -0.0591 | C |
| 7  | H7  | -0.0987 | -1.8126 | -0.1107 | H |
| 8  | C8  | -1.2305 | 0.0636  | -0.0067 | C |
| 9  | C9  | -2.5378 | -0.6913 | 0.0282  | C |
| 10 | H10 | -3.3638 | 0.0118  | 0.0616  | H |
| 11 | H11 | -2.6270 | -1.3227 | -0.8554 | H |
| 12 | H12 | -2.5720 | -1.3437 | 0.9002  | H |

|    |     |         |         |         |   |
|----|-----|---------|---------|---------|---|
| 13 | O13 | -1.2343 | 1.3056  | 0.0102  | O |
| 14 | H14 | 3.0614  | -0.4489 | -0.2133 | H |

NH...O= angle = 134°; N...O distance = 2.617 Å

## Supplementary Information – AIM

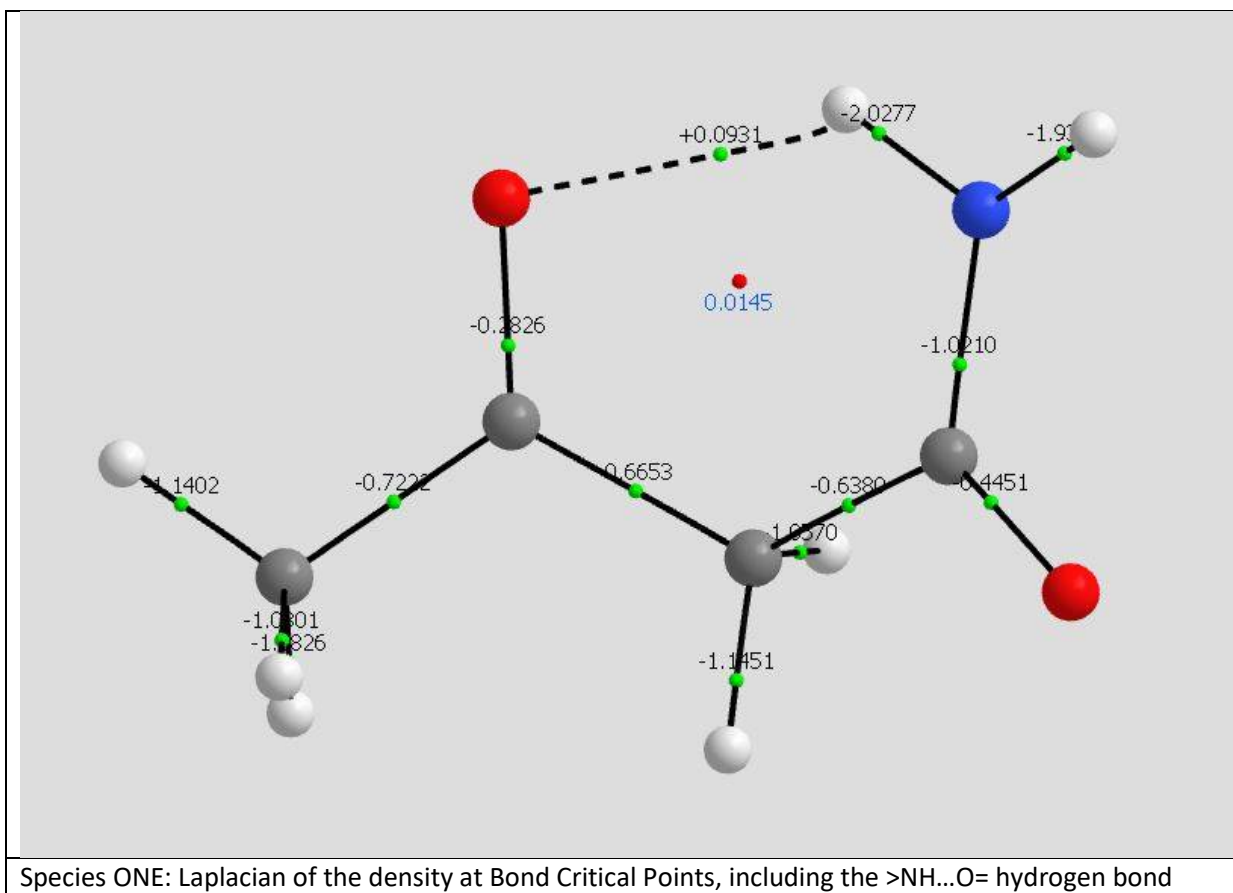

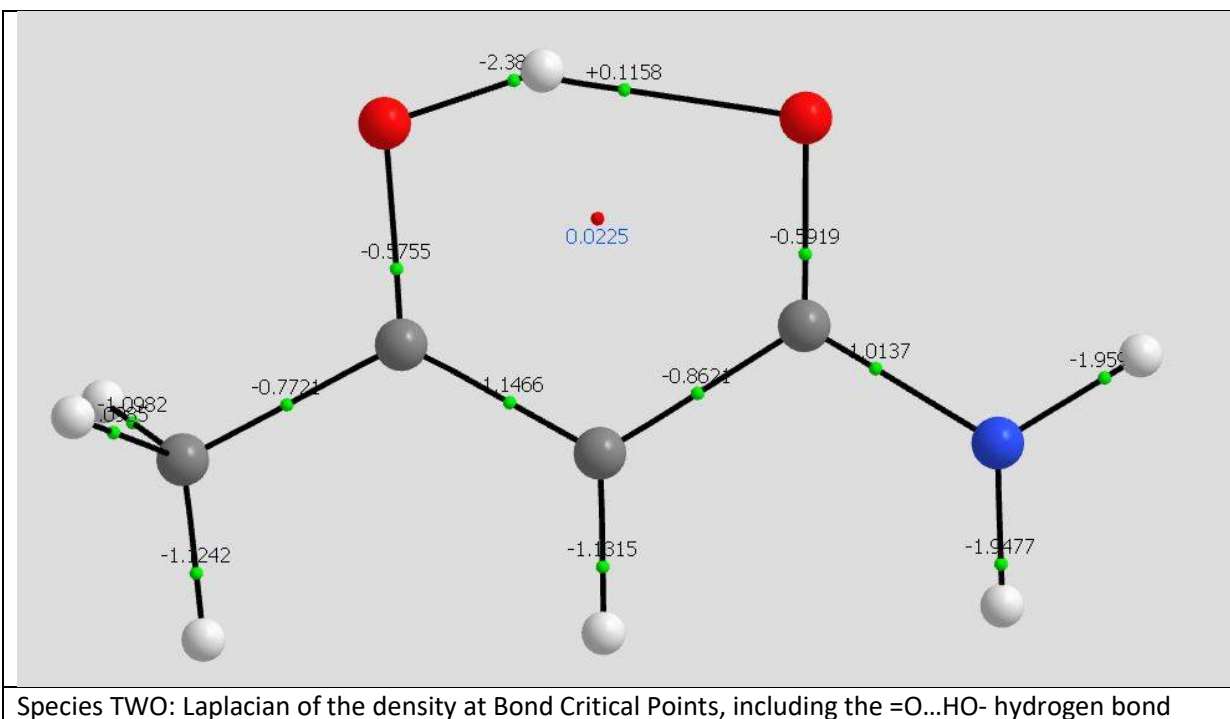

Species TWO: Laplacian of the density at Bond Critical Points, including the =O...HO- hydrogen bond

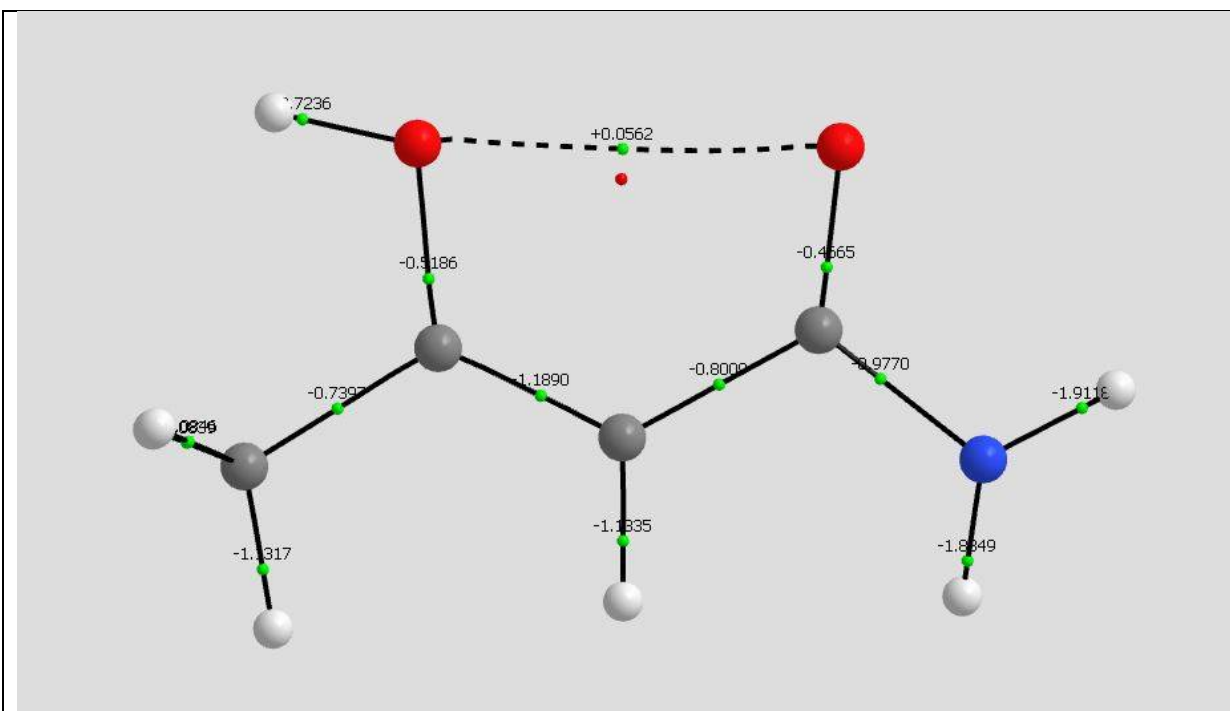

Species THREE has no recognizable H bond, but there is a non-covalent interaction between O atoms



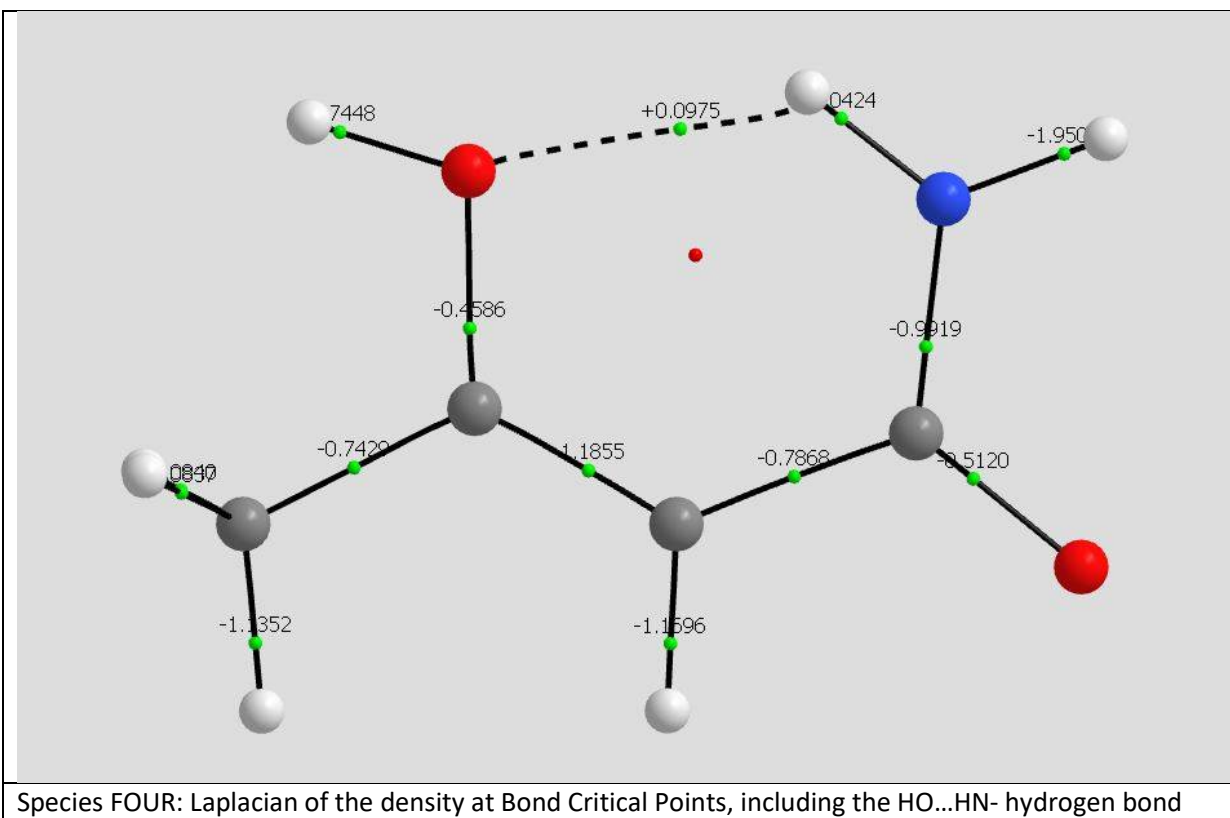

Figure 1: Topology of bonding in species ONE, TWO, THREE, and FOUR. Numerical values of the Laplacian are shown at Bond Critical Points (green dots)

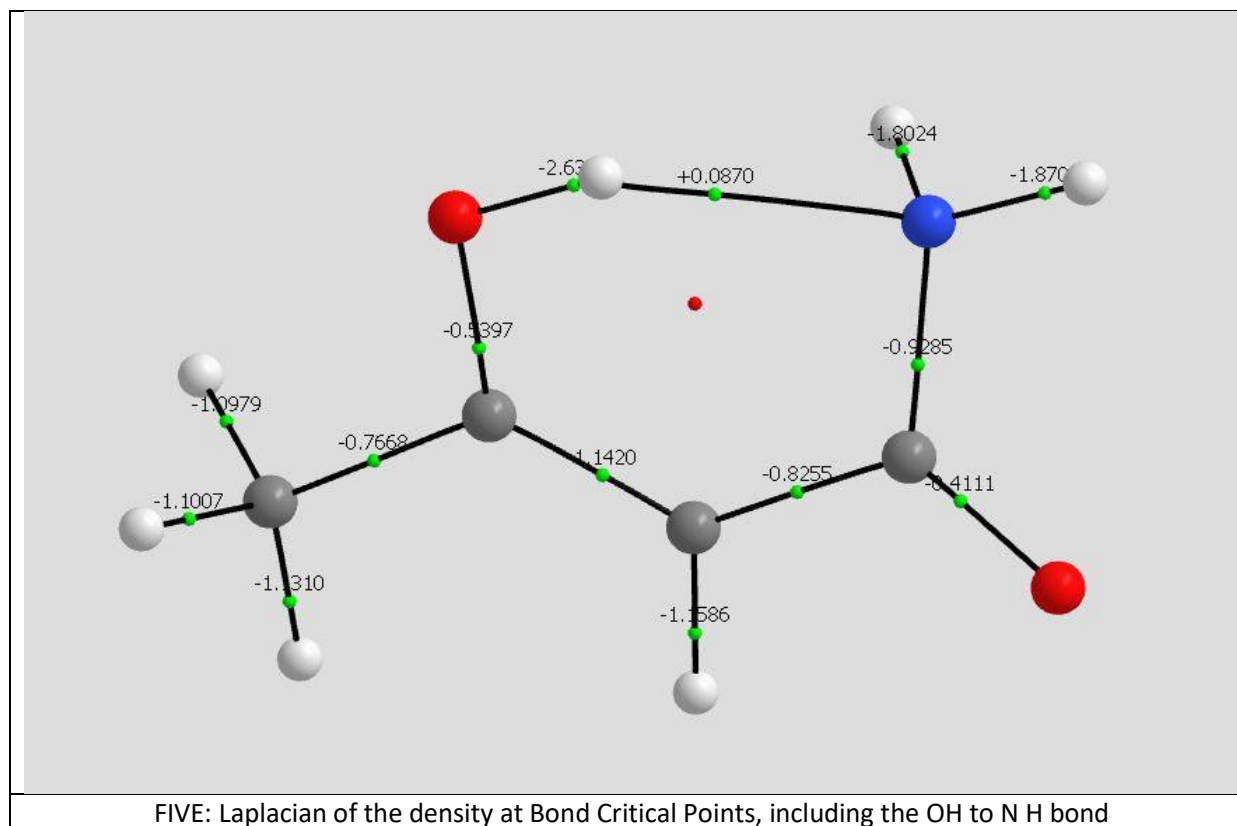

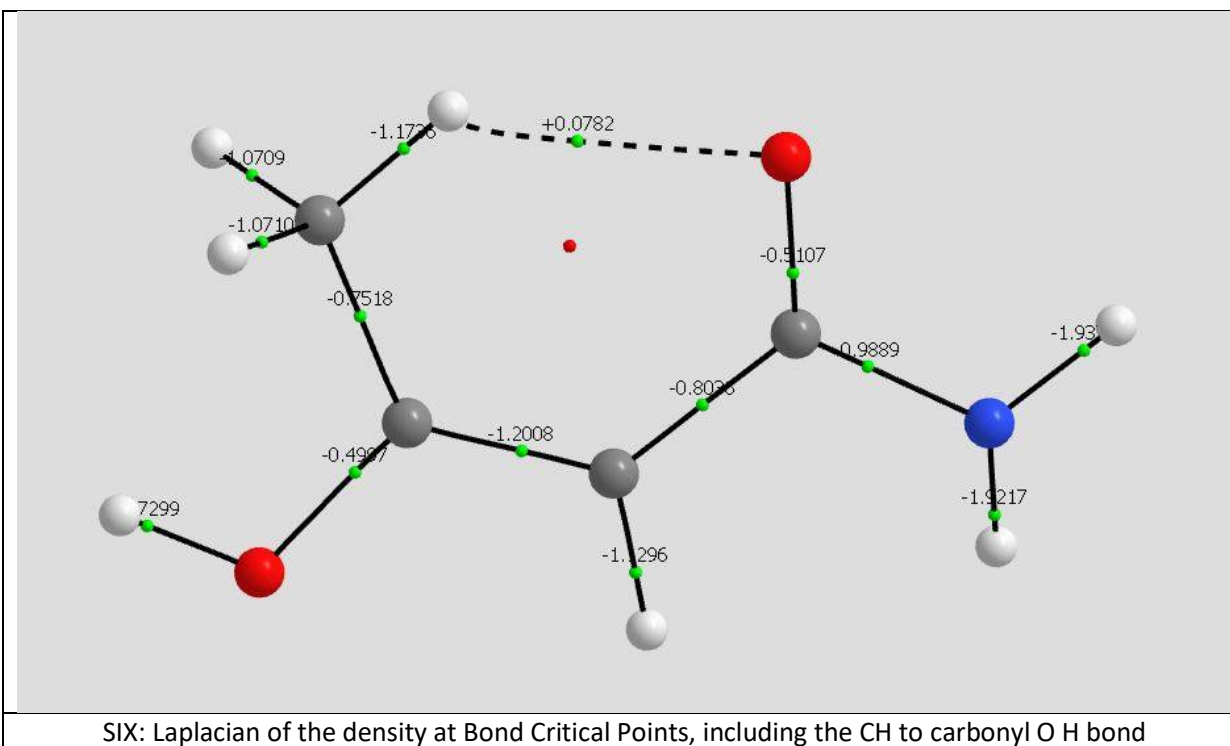

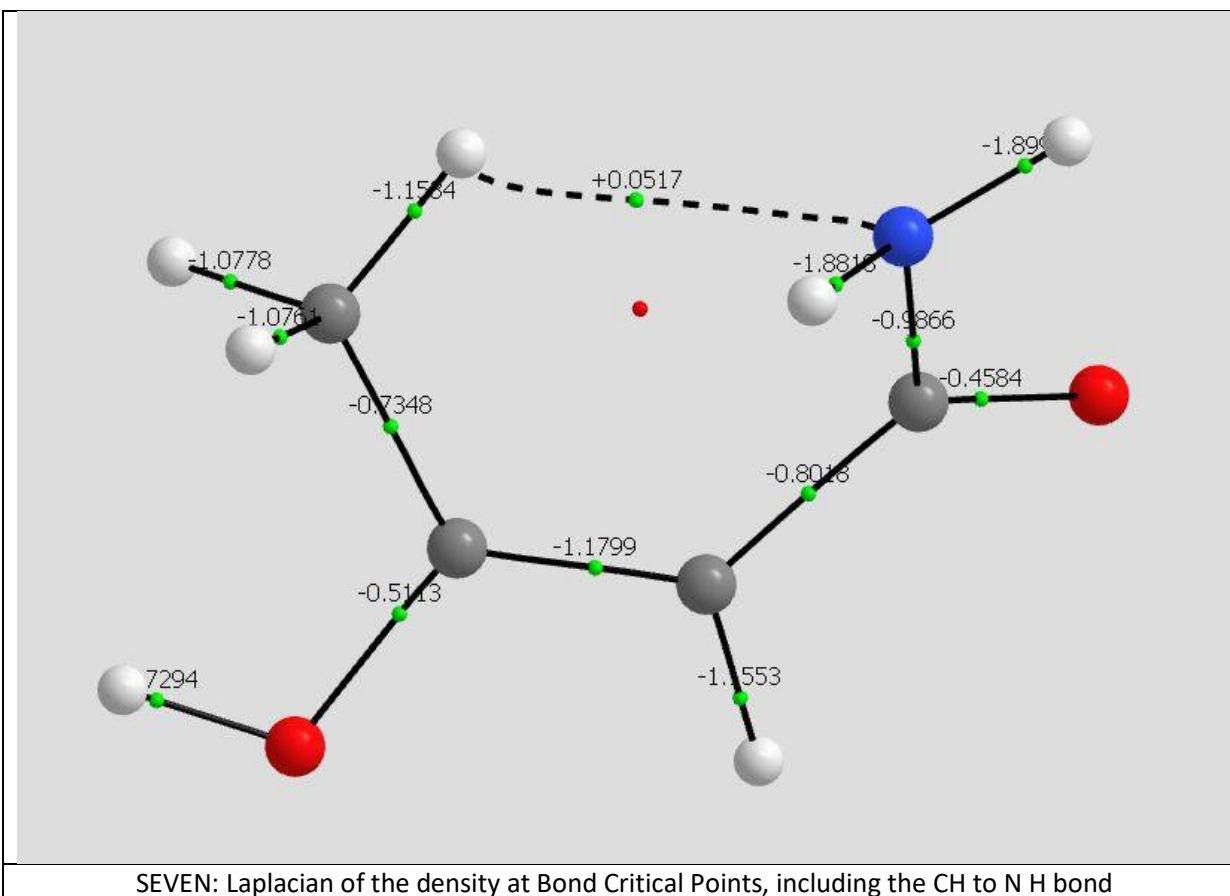

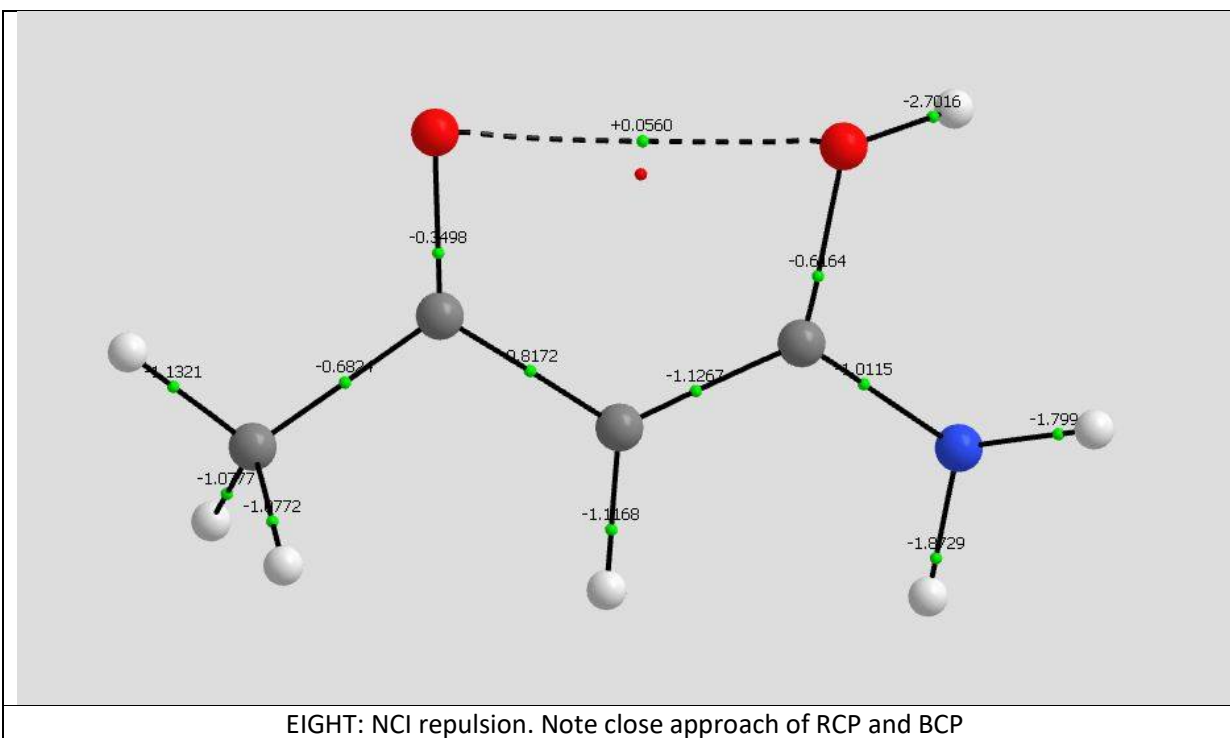

*Figure 2: Topology for species FIVE, SIX, SEVEN, and EIGHT*

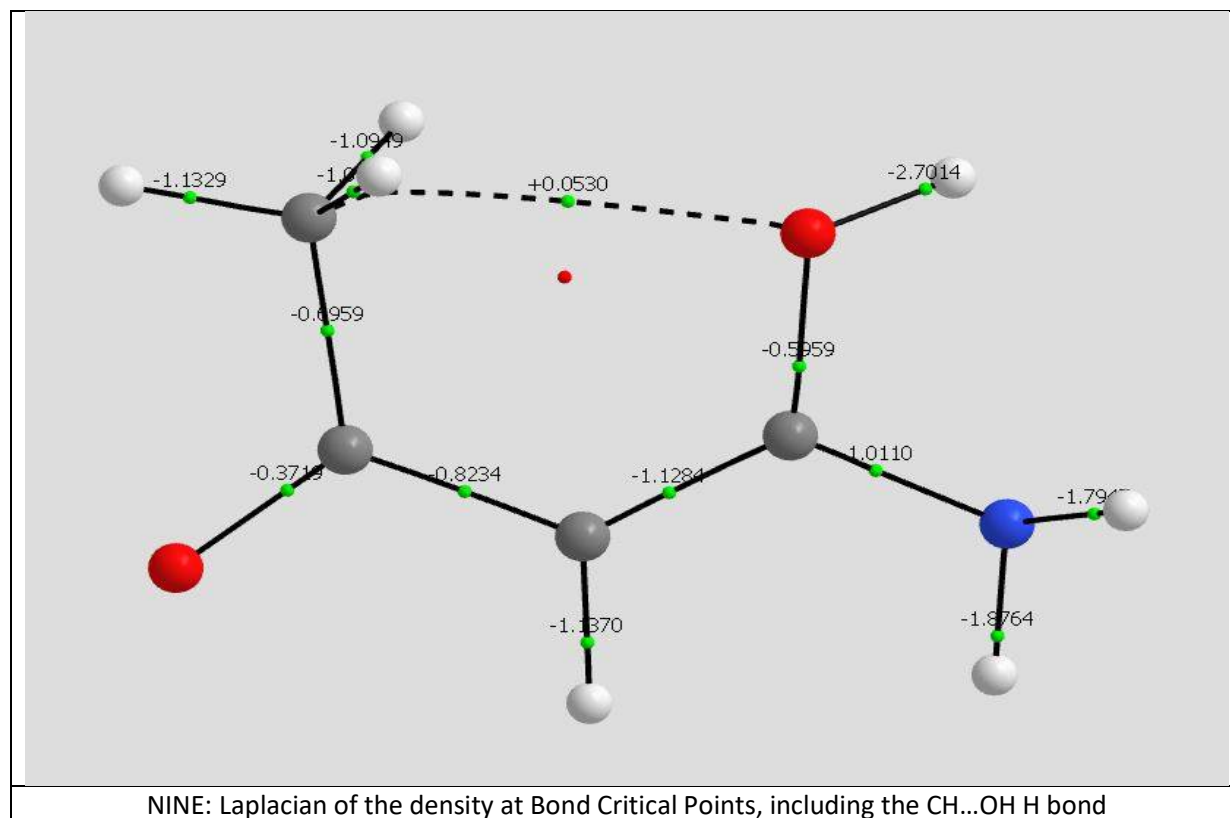

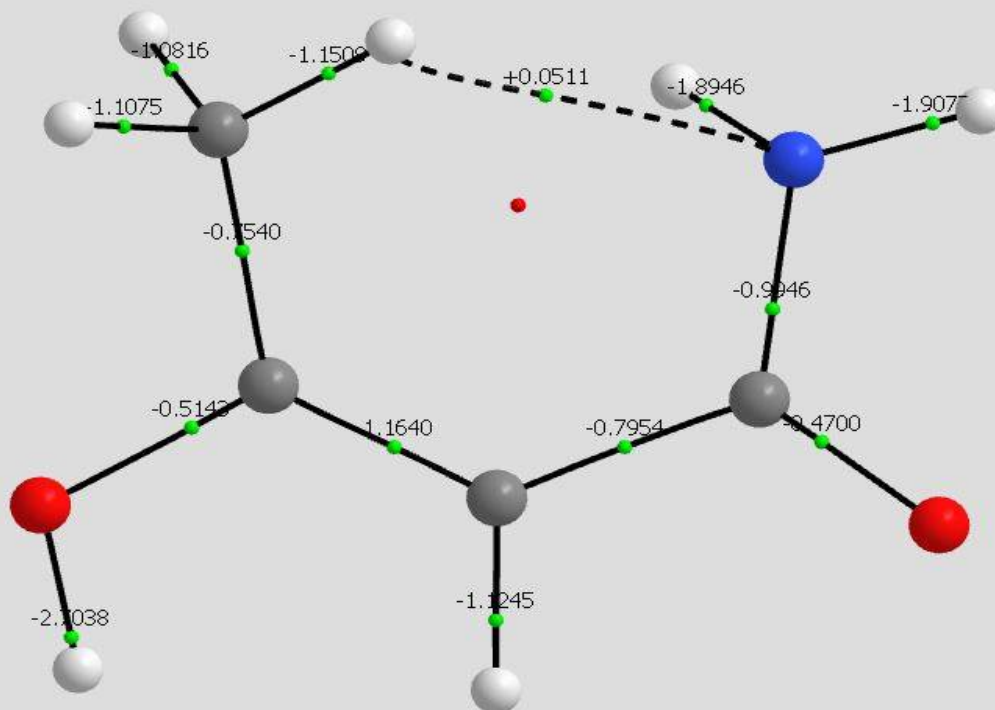

TEN: Laplacian of the density at Bond Critical Points, including the CH to N H bond

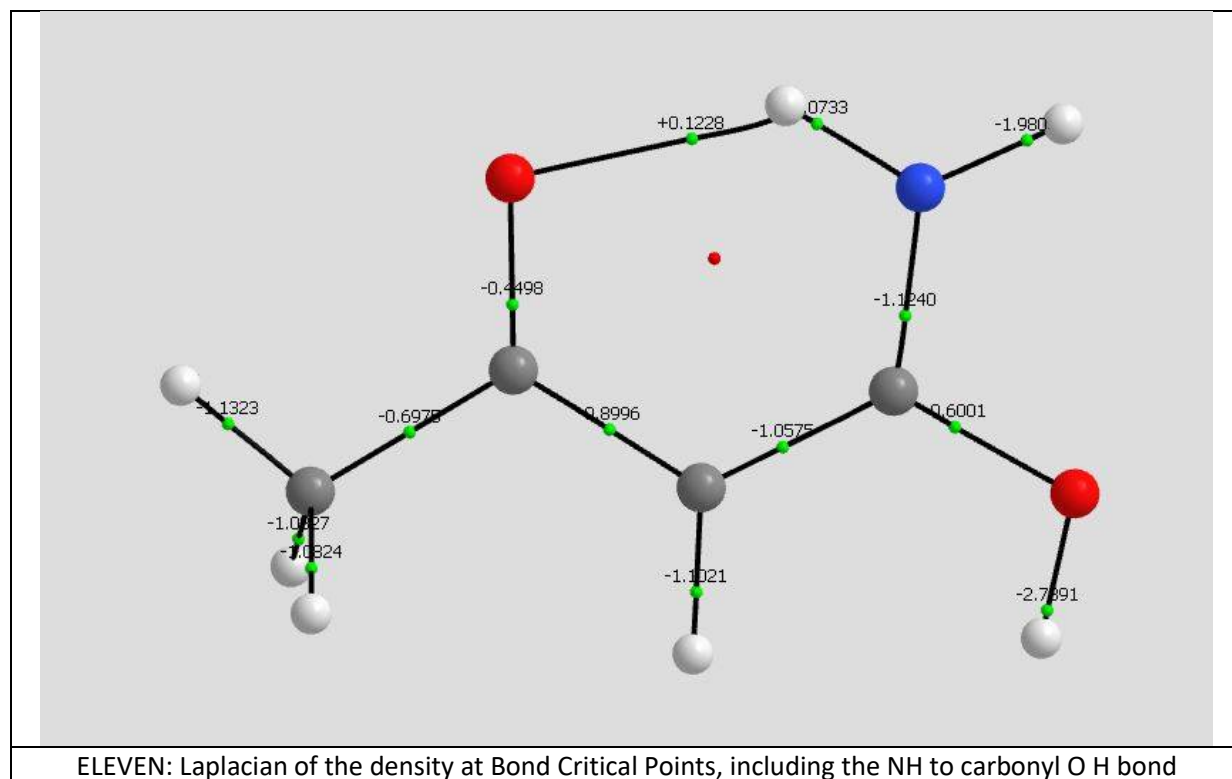

Figure 3: Species NINE, TEN, and ELEVEN
